# Supplementary material for: Modification of silica by an organic monolayer in aqueous medium using octylphosphonic acid and aluminium species
Source: Royal Society of Chemistry journal article supplement (doi:10.1039/c1jm10128e), 2011-01-01
Supplement: c1jm10128e.pdf [file c1jm10128e.pdf]

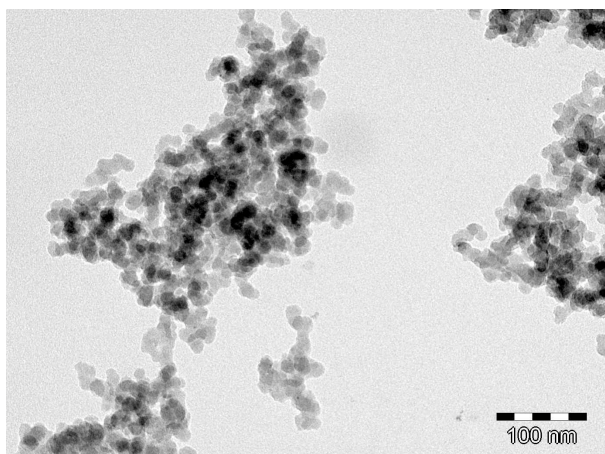

Fig. S1: TEM image of Al/SiO<sub>2</sub>.

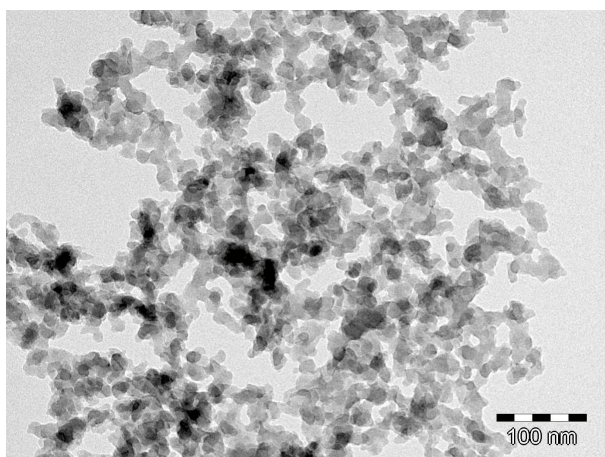

Fig. S2: TEM image of SiO<sub>2</sub>.

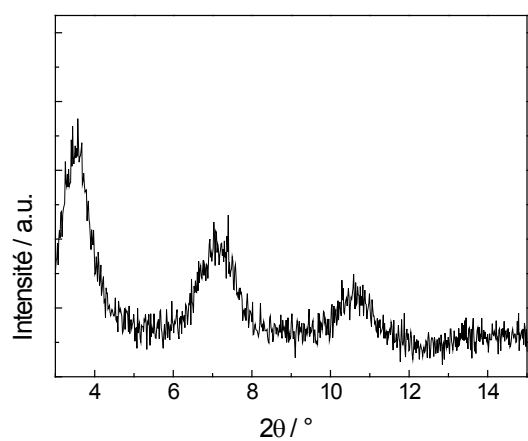

Fig. S3: Powder XRD pattern of the sample AS10 (23.8 OPA/nm<sup>2</sup>).
